# Supplementary material
Source: Springer Nature journal article supplement (https://www.springermedizin.de/resource/supplementary/12936_2010_1649_MOESM3_ESM.pdf/9542260)

PCR-F

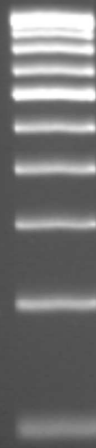

1

2

3

4

5

6

7

8

9

—500 bp

—200 bp

—100 bp

PCR-L/S

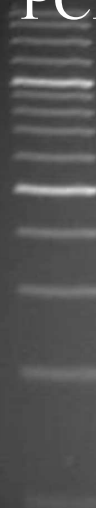

1

2

3

4

5

6

7

8

9

—500 bp

—200 bp

—100 bp

Supplement: MOESM3 [file 9542260]
